# Supplementary material for: Imaging Fos-Jun Transcription Factor Mobility and Interaction in Live Cells by Single Plane Illumination-Fluorescence Cross Correlation Spectroscopy
Source: PubMed Central journal article supplement (PMC4397054; doi:10.1371/journal.pone.0123070), 2015-04-14

c-Fos-eGFP+c-Jun-mRFP1

intensity [counts]

relative concentration  $\rho_{AB}$

fraction of the slow diffusion component  
(green channel)

0 800 0 2500

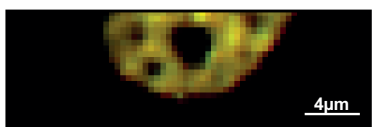

0 0.4

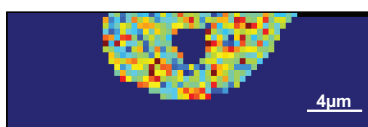

0 1

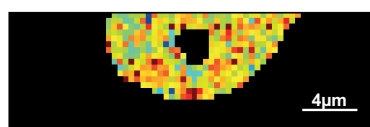

0 600 0 2000

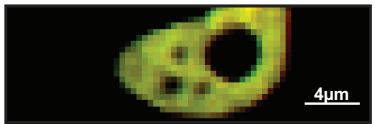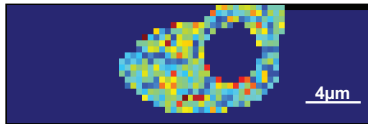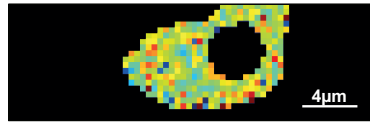

0 300 0 1500

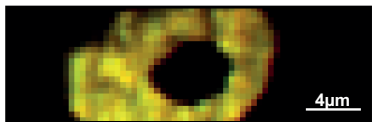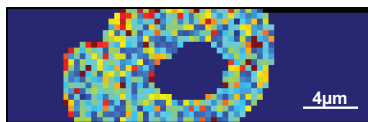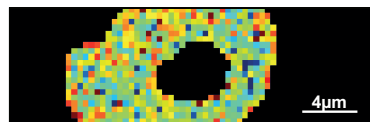

0 1500 0 4000

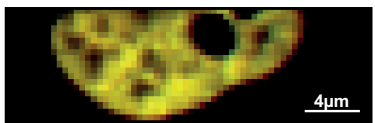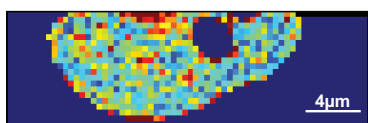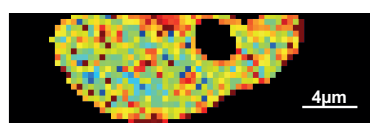

0 2000 0 3000

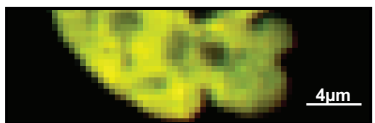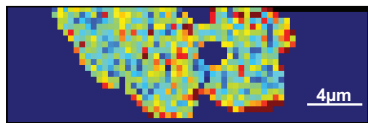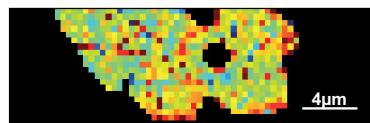

0 500 0 1000

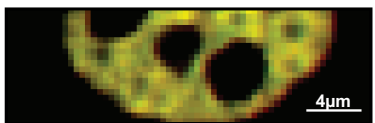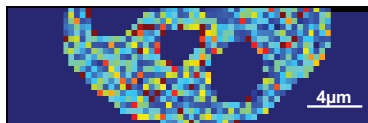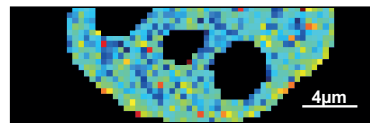

0 500 0 1000

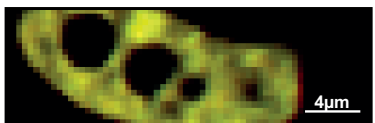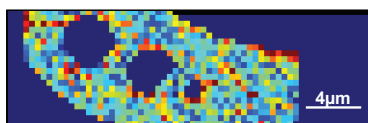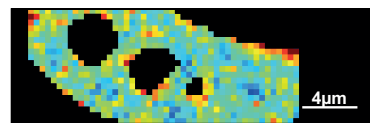

0 1200 0 2500

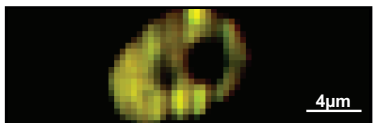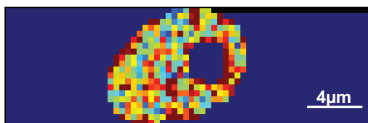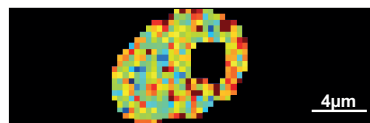

0 400 0 1000

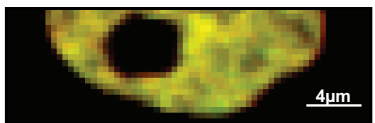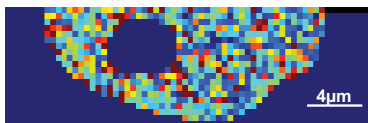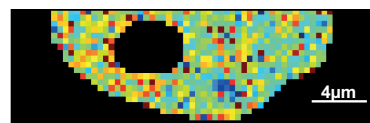

0 1000 0 3000

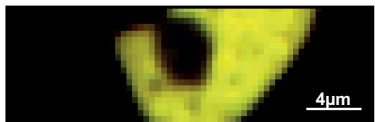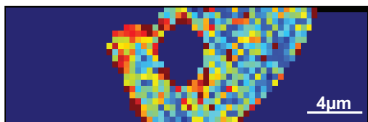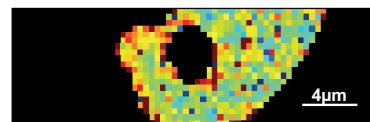

Supplement: pone.0123070.s008.pdf [file pone.0123070.s008.pdf]
