# Supplementary material for: Imaging Fos-Jun Transcription Factor Mobility and Interaction in Live Cells by Single Plane Illumination-Fluorescence Cross Correlation Spectroscopy
Source: PubMed Central journal article supplement (PMC4397054; doi:10.1371/journal.pone.0123070), 2015-04-14

c-Fos $\Delta\Delta$ -eGFP+c-Jun $\Delta\Delta$ -mRFP1

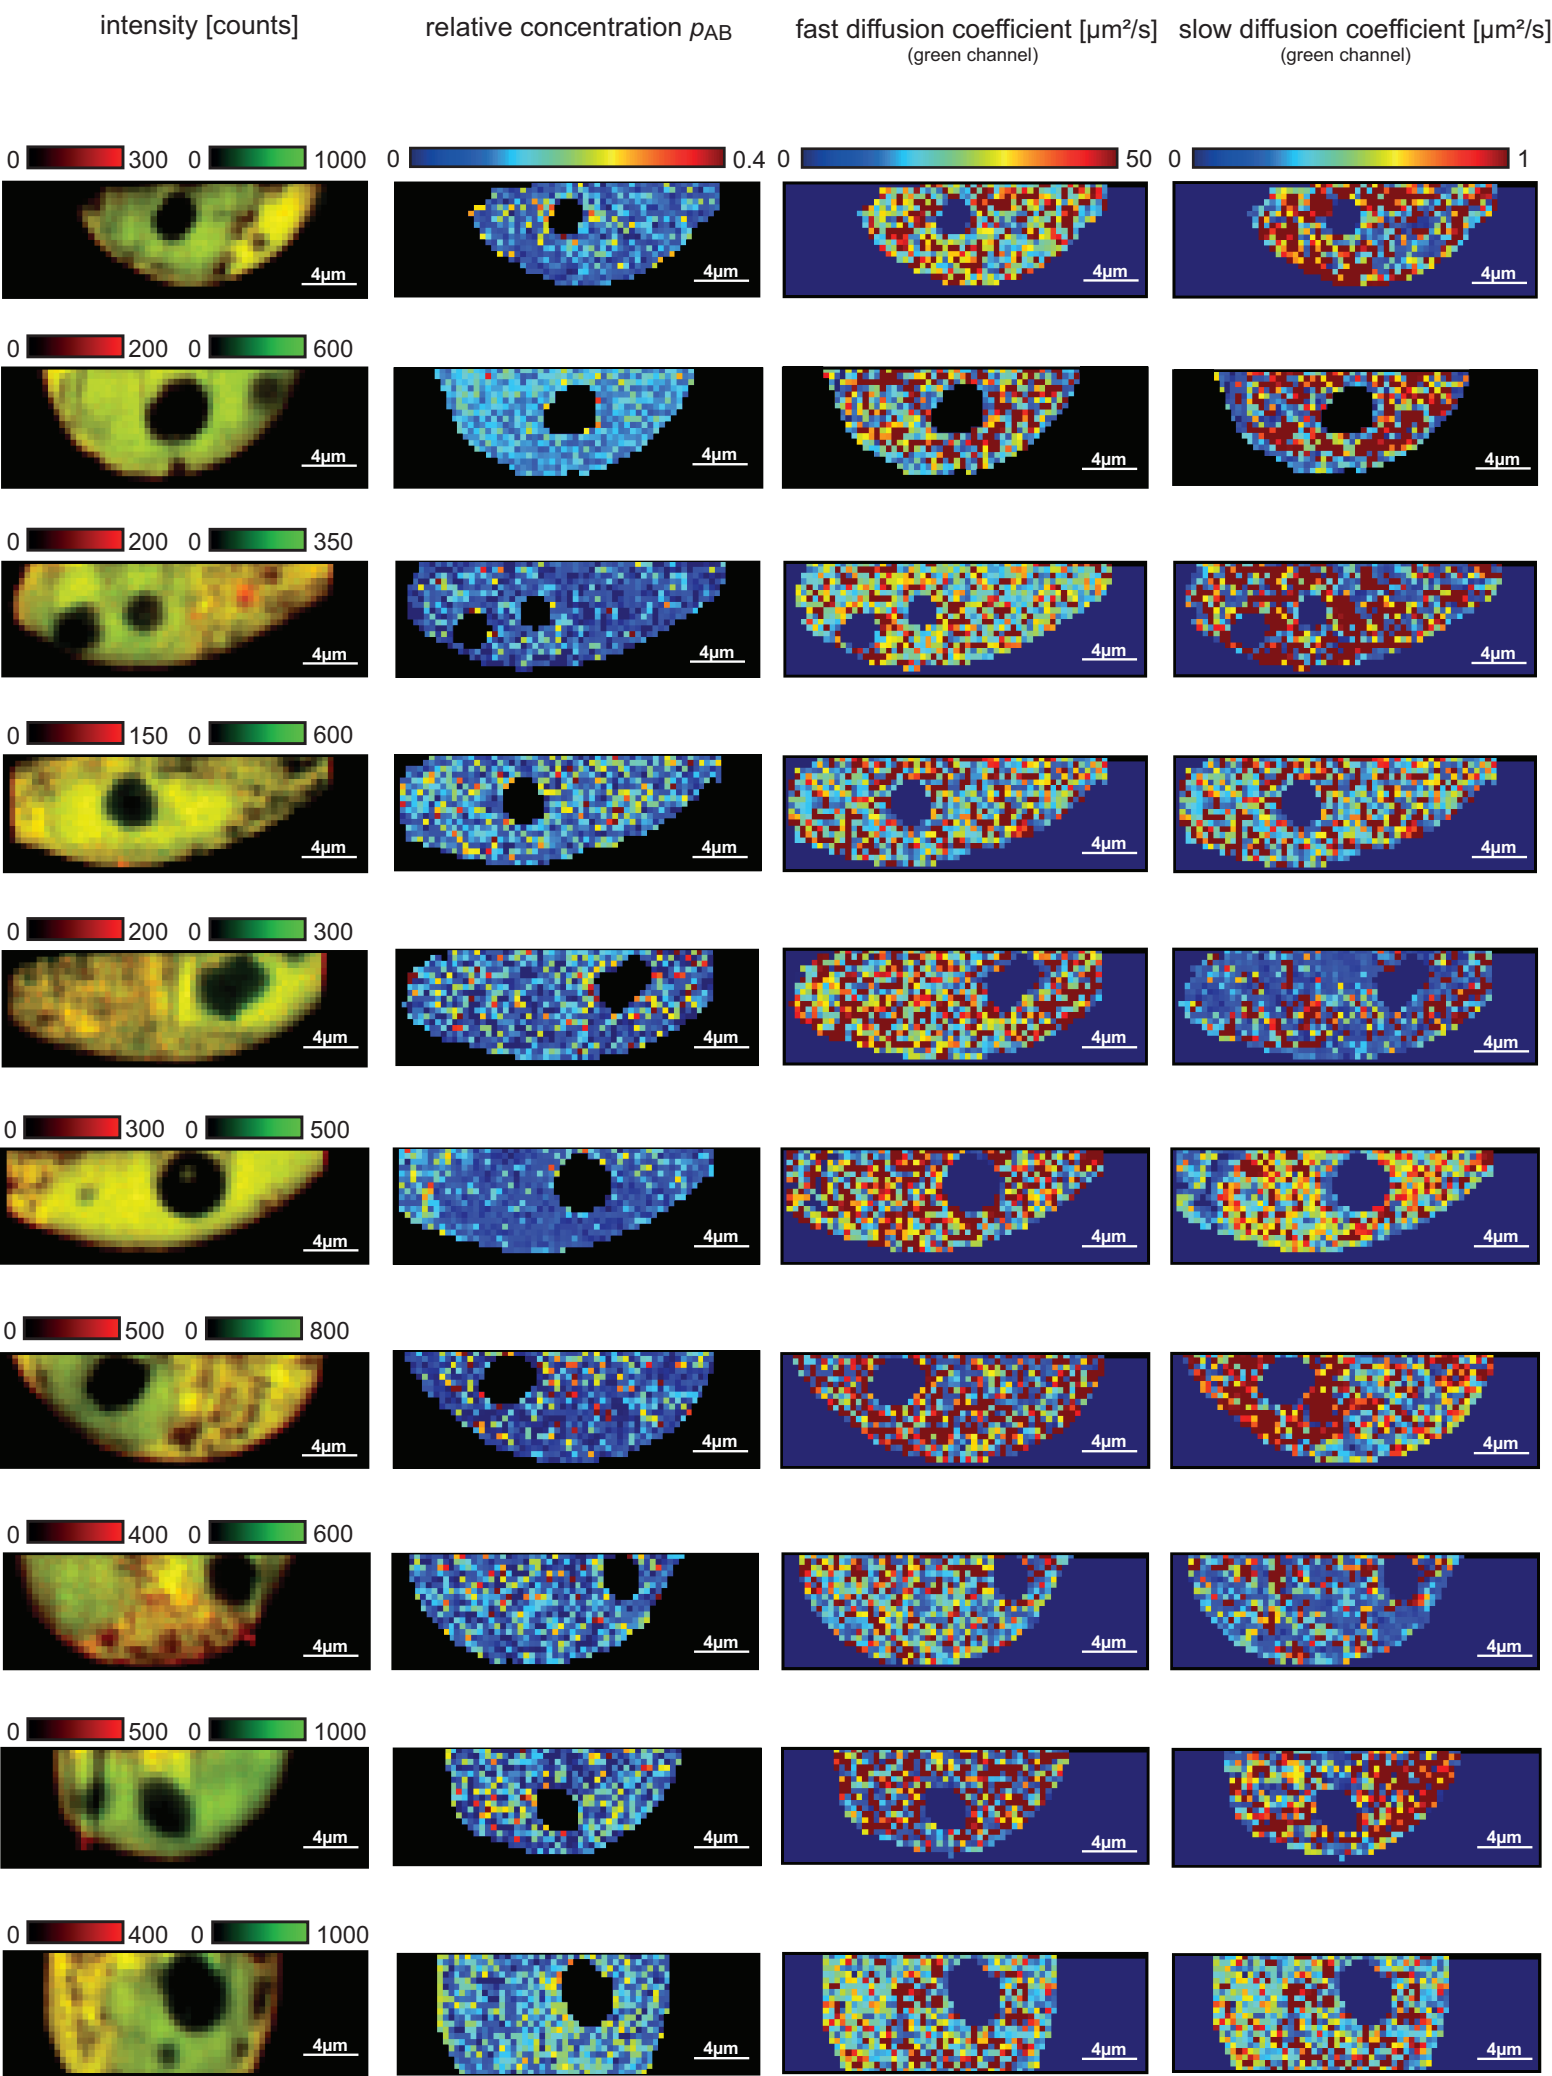

c-Fos $\Delta\Delta$ -eGFP+c-Jun $\Delta\Delta$ -mRFP1

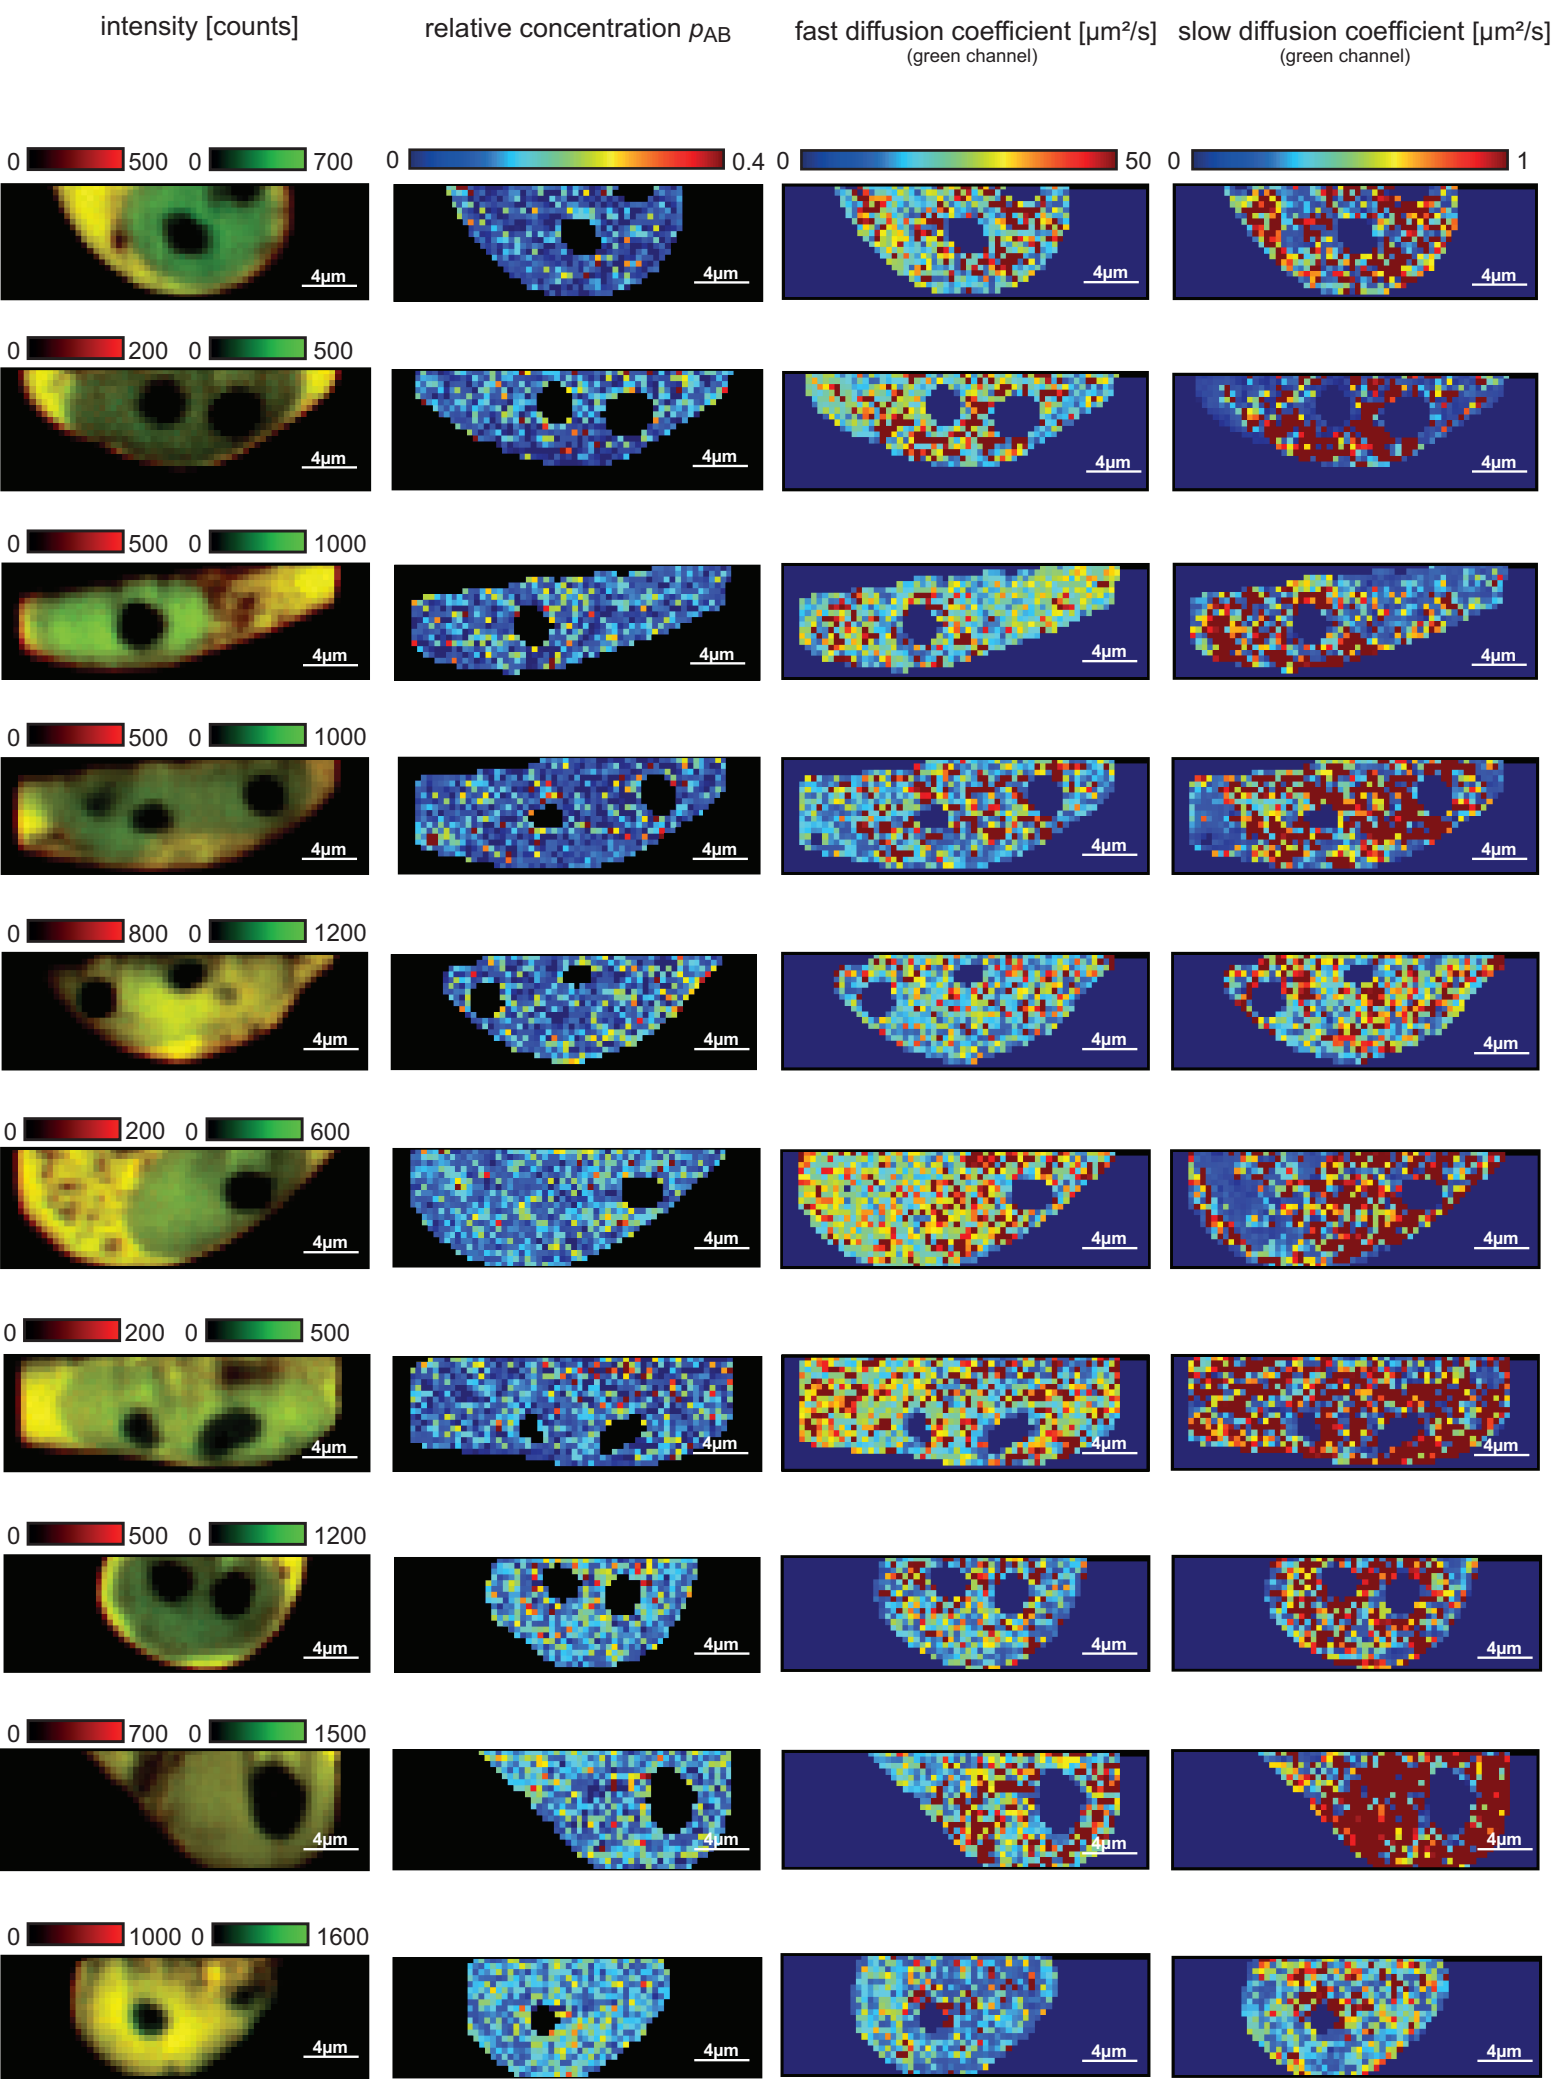

Supplement: pone.0123070.s005.pdf [file pone.0123070.s005.pdf]
