# Supplementary material for: Imaging Fos-Jun Transcription Factor Mobility and Interaction in Live Cells by Single Plane Illumination-Fluorescence Cross Correlation Spectroscopy
Source: PubMed Central journal article supplement (PMC4397054; doi:10.1371/journal.pone.0123070), 2015-04-14

c-Fos-eGFP+c-Jun-mRFP1

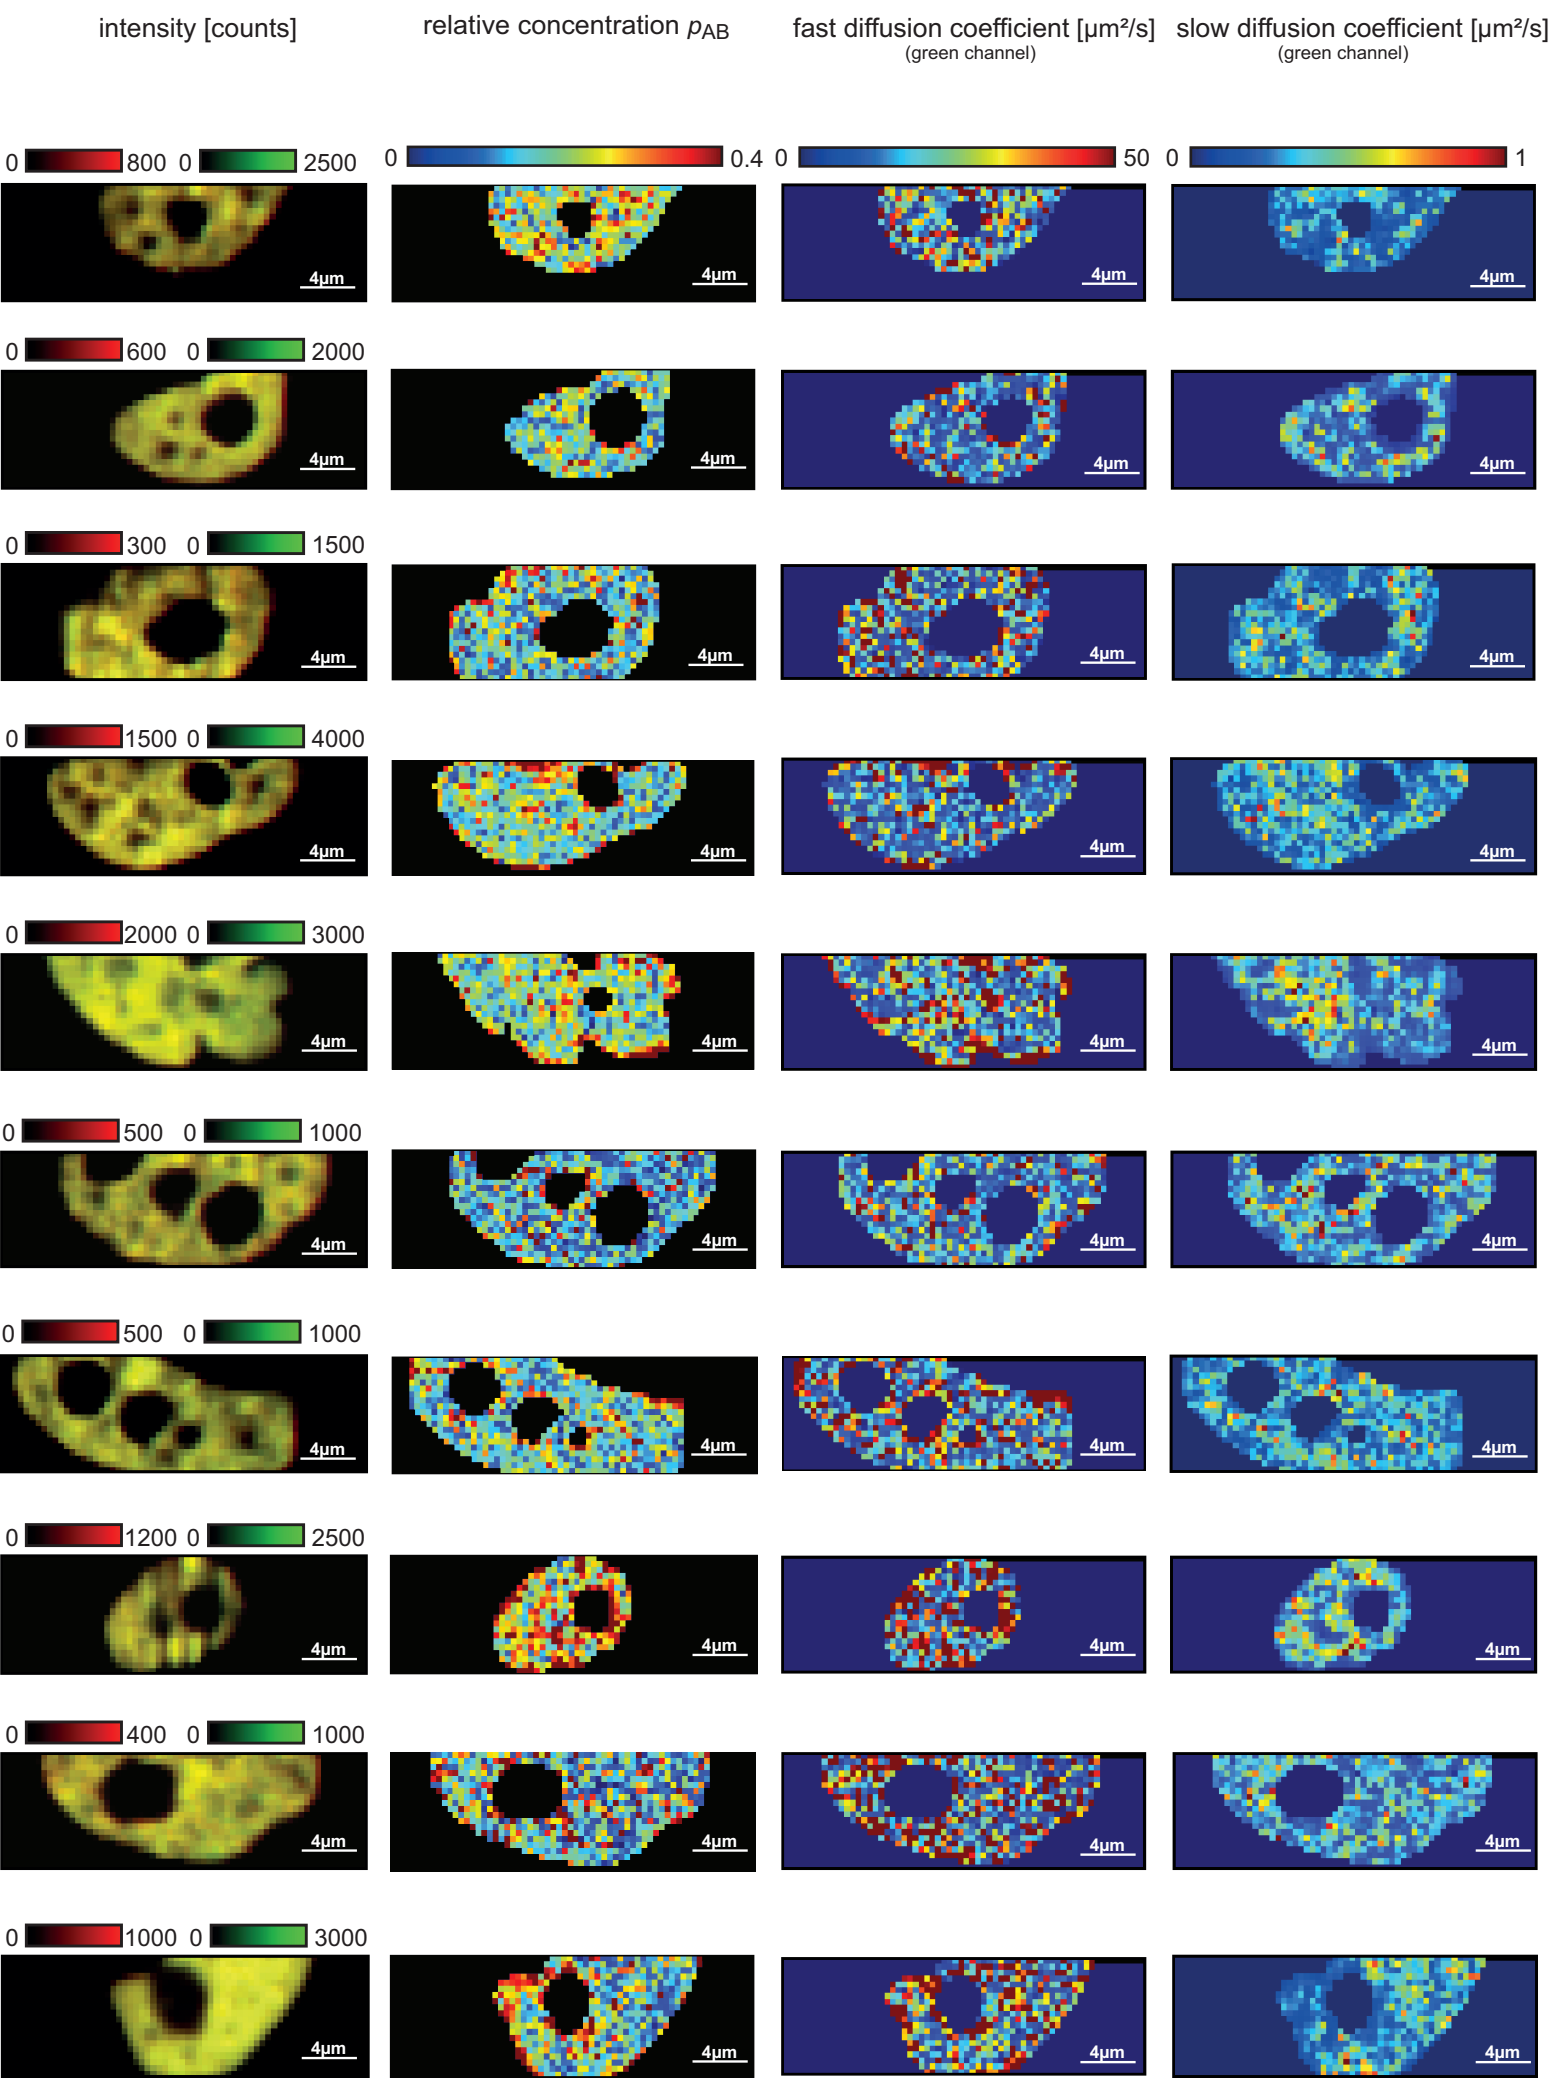

c-Fos-eGFP+c-Jun-mRFP1

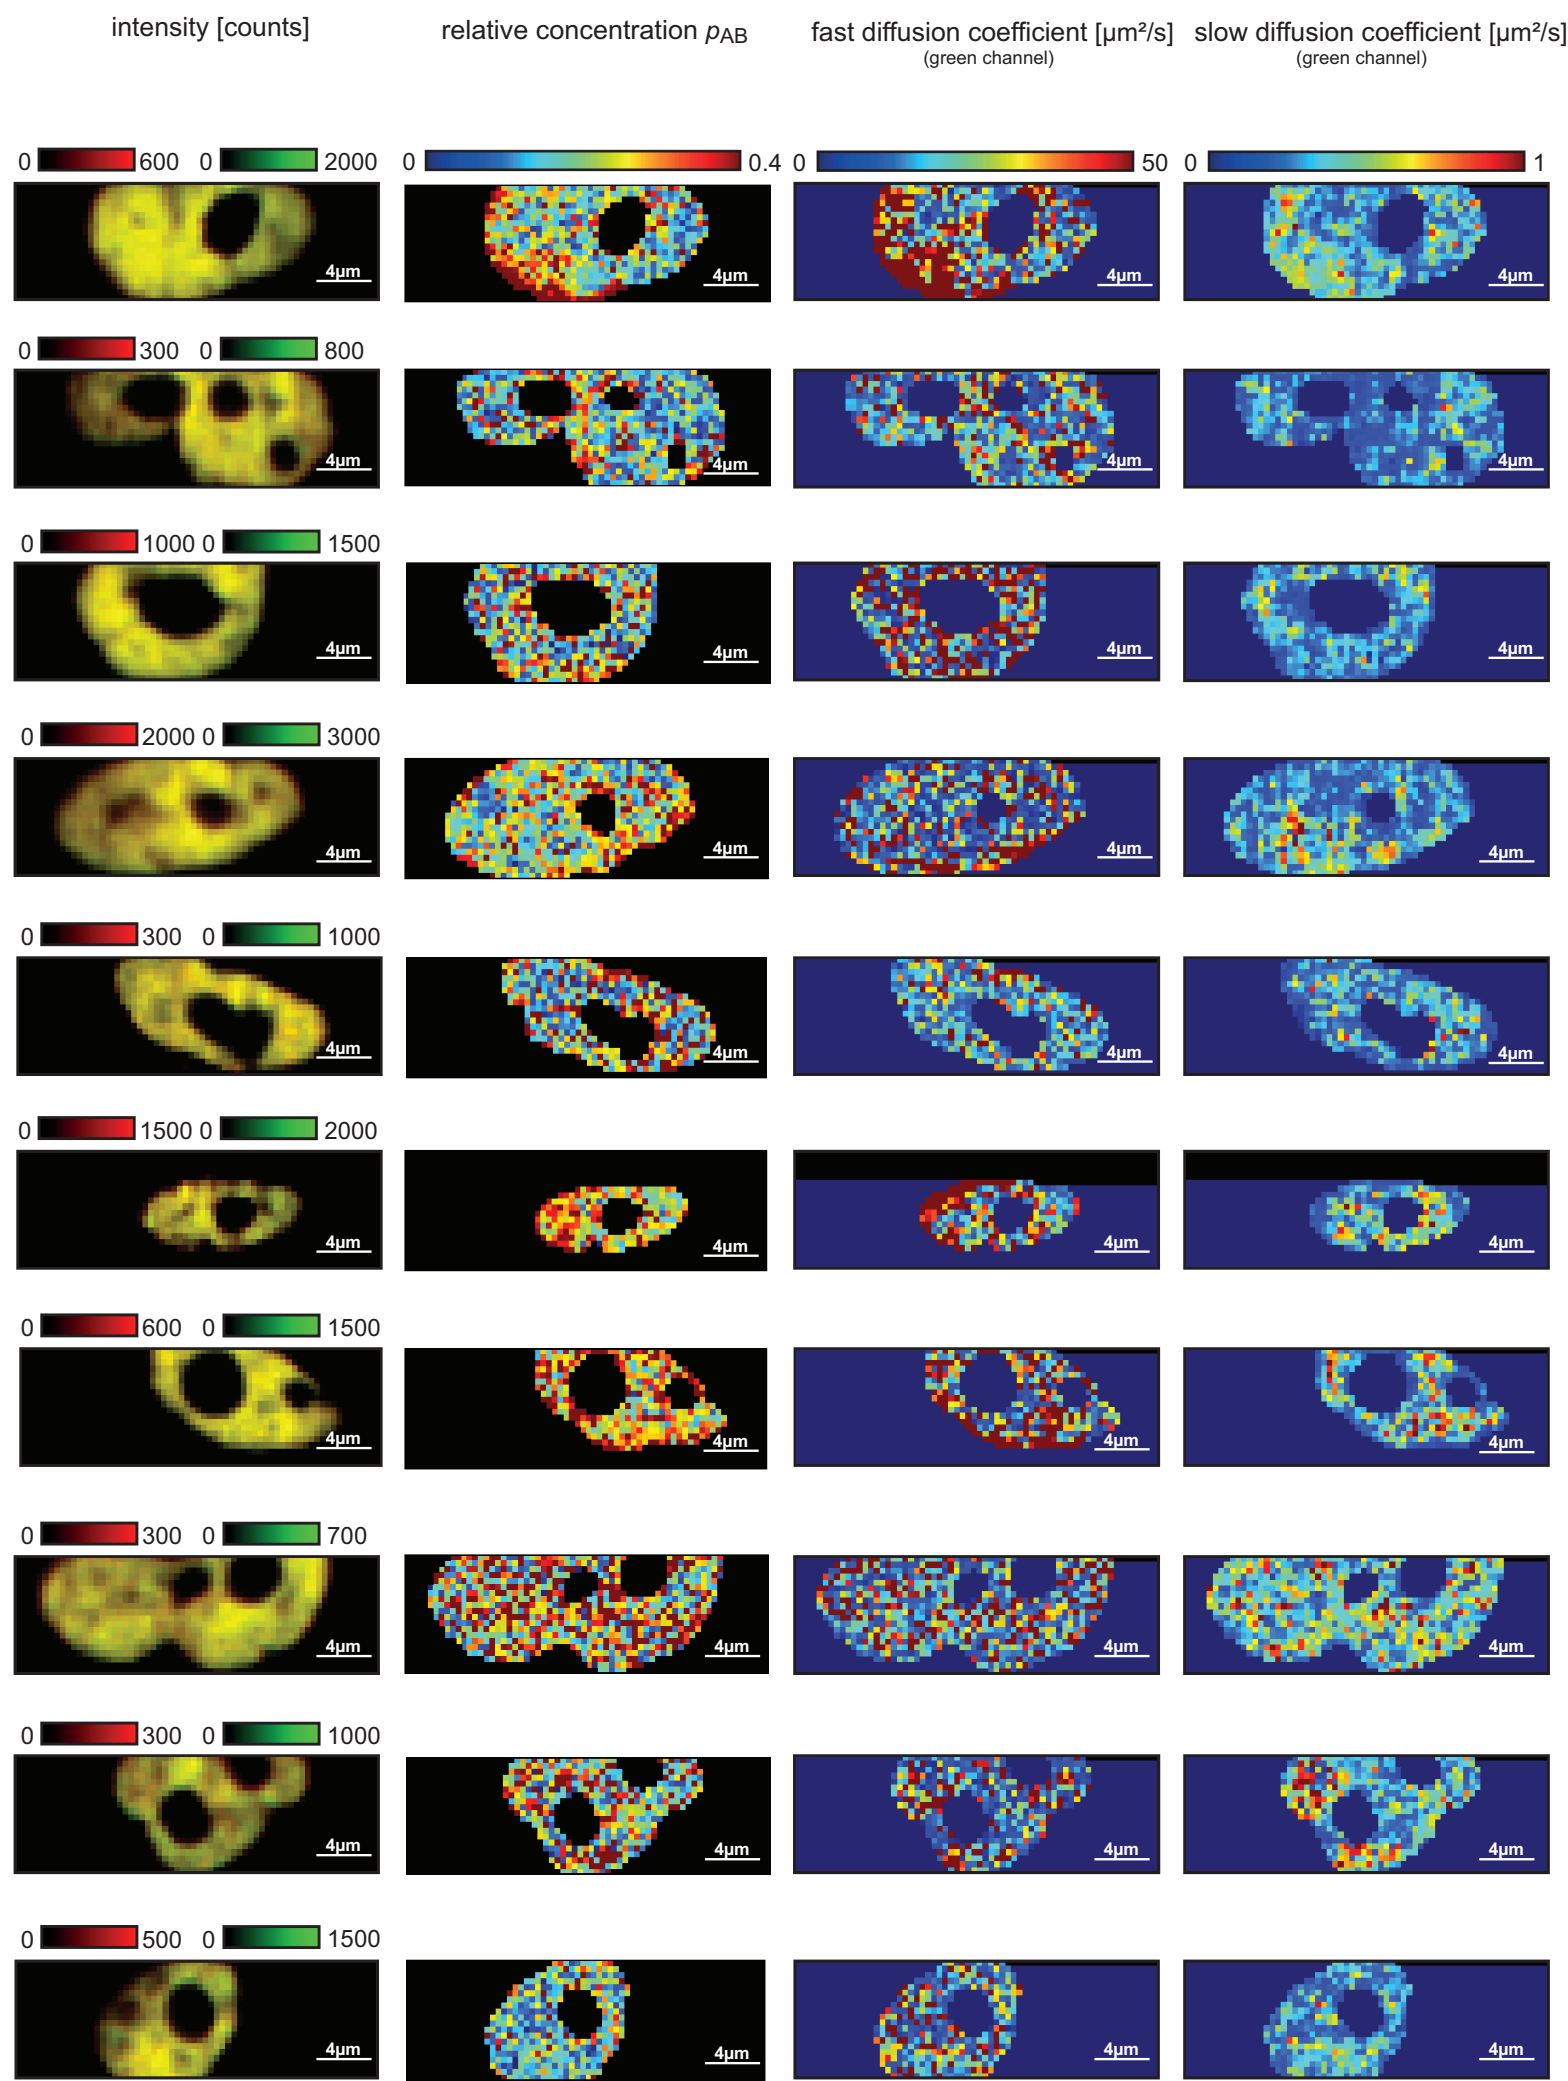

Supplement: pone.0123070.s007.pdf [file pone.0123070.s007.pdf]
